# Supplementary material
Source: Springer Nature journal article supplement (https://www.springermedizin.de/resource/supplementary/12990_2007_93_MOESM5_ESM.pdf/9612552)

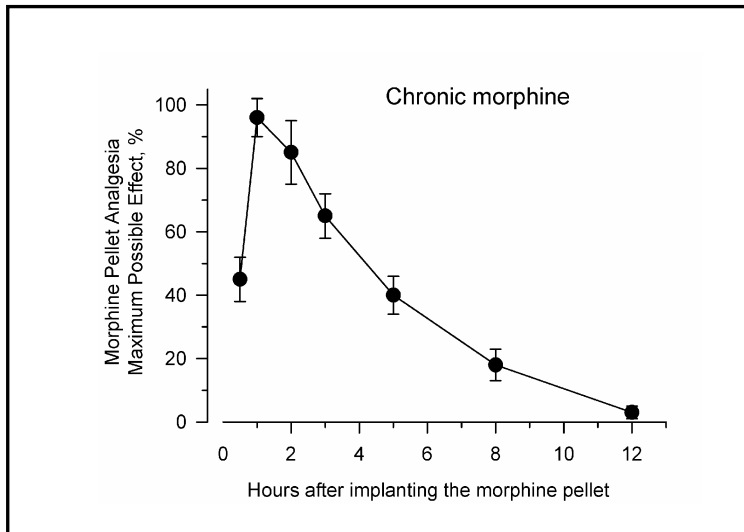

## Spinal Cord

IP: MOR

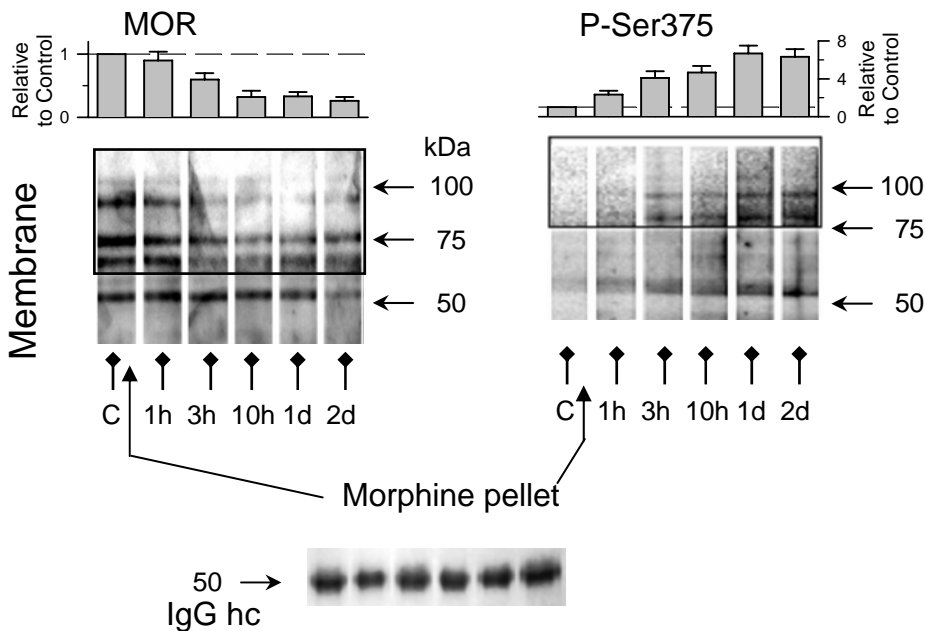

Supplement: MOESM5 [file 9612552]
